# Supplementary material
Source: PubMed Central journal article supplement (PMC6255147)
Supplement: pnas.1805574115.sapp.pdf [file pnas.1805574115.sapp.pdf]

1 **Supplementary material**

2

3 **Habitat choice meets thermal specialization: competition with specialists may drive**  
4 **suboptimal habitat preferences in generalists**

5

6 Staffan Jacob<sup>1</sup>, Estelle Laurent<sup>1</sup>, Bart Haegeman<sup>2,3</sup>, Romain Bertrand<sup>2,3</sup>, Jérôme G. Prunier<sup>2</sup>,  
7 Delphine Legrand<sup>2</sup>, Julien Cote<sup>4</sup>, Alexis S. Chainé<sup>2,5</sup>, Michel Loreau<sup>2,3</sup>, Jean Clobert<sup>2</sup> &  
8 Nicolas Schtickzelle<sup>1</sup>

9

10 <sup>1</sup> *Université catholique de Louvain, Earth and Life Institute, Biodiversity Research Centre, Croix du*  
11 *Sud 4, L7-07-04, 1348 Louvain-la-Neuve, Belgium*

12 <sup>2</sup> *Centre National de la Recherche Scientifique (CNRS), Université Paul Sabatier, Station d'Ecologie*  
13 *Théorique et Expérimentale (UMR5321), 2 route du CNRS, F-09200 Moulis, France*

14 <sup>3</sup> *Centre National de la Recherche Scientifique (CNRS), Université Paul Sabatier, Centre for*  
15 *Biodiversity Theory and Modelling, Station d'Ecologie Théorique et Expérimentale (UMR5321), 2*  
16 *route du CNRS, F-09200 Moulis, France*

17 <sup>4</sup> *Centre National de la Recherche Scientifique (CNRS), Université Paul Sabatier, Laboratoire*  
18 *Evolution & Diversité Biologique (UMR5174), 118 route de Narbonne, F-31062 Toulouse.*

19 <sup>5</sup> *Institute for Advanced Studies in Toulouse, Toulouse School of Economics, 21 allée de Brienne,*  
20 *31015 Toulouse, France*

21

22 **Corresponding author:**

23 Staffan Jacob (jacobstaffan@gmail.com)

24 *Université catholique de Louvain, Earth and Life Institute, Biodiversity Research Centre,*  
25 *Croix du Sud 4, L7-07-04, 1348 Louvain-la-Neuve, Belgium*

## 26 ***Quantification of habitat choice in *Tetrahymena thermophila* microcosms***

27

28 To quantify the relationship between dispersal decisions and expected fitness, and thus the  
29 habitat choice strategies of genotypes, we fitted a simple model in which dispersal rates ( $D_e$   
30 for emigration; see below for immigration) depend on expected fitness  $\bar{f}$ , habitat choice ( $h_e$   
31 for emigration;  $h_i$  for immigration; see below) and dispersal propensity ( $Dp_e$ ; the tendency to  
32 disperse at  $\bar{f} = 0.5$ ) using the functions:

$$D_e = Dp_e - h_e (\bar{f} - 0.5)$$

33 At the emigration step, we fitted the above model using the *nls* function from the *stats* R-  
34 package, with 10 values of  $D_e$  for each genotype corresponding to emigration rates in the 10  
35 dispersal systems used. The input variables of the model were  $\bar{f}$  and  $D_e$ , while  $h_e$  and  $Dp_e$   
36 were estimated using the *nls* function, as well as the variance of these estimates (Figure 3;  
37 Table S2). To avoid dispersal rate values outside the [0,1] limits when  $Dp_e \neq 0.5$ , we  
38 constrained habitat choice values within  $[-2 \min(Dp_e, 1-Dp_e), +2 \min(Dp_e, 1-Dp_e)]$  using the  
39 *nls* function. This assumes that habitat choice ability decreases when dispersal propensity  
40 deviates from 0.5, meaning, for instance, that a genotype with a low dispersal propensity will  
41 never reach a probability = 1 to leave a suboptimal habitat. We also estimated habitat choice  
42 using a model that does not make this assumption, but consequently assumes a nonlinear  
43 relationship between habitat choice  $h$  and expected fitness  $\bar{f}$ , and habitat choice estimates  
44 were highly correlated between these two methods ( $R^2 = 0.971$ ).

45 At the immigration step, two immigration rates were quantified for each 3-patch dispersal  
46 system: the proportion of dispersers that moved toward the 27°C patch and the proportion that  
47 moved toward the 35°C patch. This resulted in 10 pairs of immigration rates  $D_i$  for each  
48 genotype. Because these two proportions are dependent (their sum is equal to one), we

49 subtracted the following habitat choice equations (i.e. one for immigration toward 27°C and  
50 one toward 35°C)

$$D_{i\ 27^{\circ}C} = Dp_i + h_i (\bar{f}_{27^{\circ}C} - 0.5)$$

51 and

$$D_{i\ 35^{\circ}C} = Dp_i + h_i (\bar{f}_{35^{\circ}C} - 0.5)$$

52 leading to

$$D_{i\ 27^{\circ}C} - D_{i\ 35^{\circ}C} = h_i (\bar{f}_{27^{\circ}C} - \bar{f}_{35^{\circ}C})$$

53 This resulted in 10 independent estimates of habitat choice at immigration (i.e. one for  
54 each 3-patch system):

$$h_i = \frac{D_{i\ 27^{\circ}C} - D_{i\ 35^{\circ}C}}{\bar{f}_{27^{\circ}C} - \bar{f}_{35^{\circ}C}}$$

55 We used the mean of these 10 values as the final estimate of habitat choice  $h_i$  for each  
56 genotype. Note that subtracting the habitat choice equations at immigration allows removing  
57 the parameter  $Dp_i$  from the resulting equation, with estimated dispersal propensity being the  
58 tendency of a genotype to emigrate (i.e.  $Dp_e$ ). The expected fitness  $\bar{f}$  in the start patch was  
59 used for habitat choice at emigration and expected fitness in neighbouring patches was used  
60 for immigration, with habitat choice estimated separately for emigration and immigration.

61 Quantifying habitat choice using the above-described model allows quantifying  
62 standardized habitat choice parameters within the [-1,1] limits. The resulting estimates are  
63 equal to regression estimates, except in some cases when low expected fitness differences  
64 between temperatures coupled with important emigration or immigration ratio make simple  
65 regression estimates to go out the [-1,1] limits (Pearson correlation between standardized  
66 habitat choice values and regression estimates at emigration: 1;  $t_{10} = \text{Inf}$ ;  $p < 0.001$ ; at  
67 immigration: 0.84;  $t_{10} = 4.98$ ;  $p < 0.001$ ).

68

69 ***Construction of thermal niches in the model***

70

71 In the metapopulation model, the spatiotemporal variability is such that local temperature  
72 varies between a cold  $T_1$ , a central  $T_2$  and a warm temperature  $T_3$ . Hence we constructed the  
73 thermal niches based on thermal optimum and degree of specialization to define three fitness  
74 values  $f_i(T_1)$ ,  $f_i(T_2)$  and  $f_i(T_3)$  for each strategy  $i$ . The thermal optimum is the temperature at  
75 which fitness is maximal (either  $T_1$ ,  $T_2$  or  $T_3$ ), and the degree of specialization determines the  
76 fitness difference between the optimal habitat and the other temperatures (the larger this  
77 difference, the more specialist the strategy).

78 We imposed a specialist-generalist trade-off between the three fitness values of the thermal  
79 niches, with  $\alpha$  denoting the strength of the trade-off:

$$f_i(T_1)^{\frac{1}{\alpha}} + f_i(T_2)^{\frac{1}{\alpha}} + f_i(T_3)^{\frac{1}{\alpha}} = 1$$

80 Each strategy  $i$  is defined by a degree of specialization  $s_i$ , taking values between 0 (for the  
81 perfect generalist) and 1 (for a perfect specialist), given by:

$$s_i = \frac{\max \{ f_i(T_1), f_i(T_2), f_i(T_3) \} - \frac{1}{3^\alpha}}{1 - \frac{1}{3^\alpha}}$$

82 A perfect specialist has one fitness value equal to 1 and the two others equal to 0, while the  
83 perfect generalist has three identical fitness values  $f_i(T_1) = f_i(T_2) = f_i(T_3) = \frac{1}{3^\alpha}$ . We imposed  
84 symmetric thermal niches when the thermal optimum is the central temperature  $T_2$  (see  
85 second row in Figure S3). For specialists of the cold and warm margins, we assumed a linear  
86 decrease of fitness when moving away from the optimum (see for instance top right niche in  
87 Figure S3, with the fitness at the central temperature  $T_2$  set to the mean of the fitness values at  
88 the margins:  $f_i(T_2) = \frac{1}{2} (f_i(T_1) + f_i(T_3))$ ). For the most specialist strategies in which a  
89 linear decrease of fitness would lead to negative fitness values at the second margin (i.e. when

90  $f_i(T_1) > (1 + 2^{-\frac{1}{\alpha}})^{-\alpha}$ , we set the fitness at the second margin to 0 (see for instance top left  
91 in Figure S3).

92

93 To construct the pool of competing strategies, we first selected a set of thermal niches. We  
94 varied the degree of specialization from 0 to 1 in 20 steps, and this for the three possible  
95 thermal optima (see Figure S3). Together with the perfect generalist, this led to 61 thermal  
96 niches. Each of these thermal niches was then combined with habitat choice parameter  $h_i$   
97 varying from  $-1$  to  $1$  in steps of  $0.2$ . This resulted in a pool of  $61 \times 11 = 671$  competing  
98 strategies. We verified that qualitatively similar results were obtained for other choices of the  
99 strategy pool.

100

101 **Table S1:** List of the genotypes used in this study. Identities of genotypes (code) and  
 102 identifying numbers at the Tetrahymena Stock Centre, Cornell (TSC ID) are shown.

| Code       | TSC ID  | Sampling done by | City       | isolation date | reference                    |
|------------|---------|------------------|------------|----------------|------------------------------|
| <b>D1</b>  | SD01546 | Doerder FP       | Ridgway    | 21/08/02       | Zufall et al. 2013. Mol.Ecol |
| <b>D2</b>  | SD01547 | Doerder FP       | Ridgway    | 21/08/02       | Zufall et al. 2013. Mol.Ecol |
| <b>D3</b>  | SD01548 | Doerder FP       | Warren     | 01/06/03       | Zufall et al. 2013. Mol.Ecol |
| <b>D4</b>  | SD01549 | Doerder FP       | Warren     | 01/06/03       | Zufall et al. 2013. Mol.Ecol |
| <b>D6</b>  | SD01551 | Doerder FP       | Warren     | 01/06/03       | Zufall et al. 2013. Mol.Ecol |
| <b>D7</b>  | AK III  | Doerder FP       | unknown    | unknown        | Zufall et al. 2013. Mol.Ecol |
| <b>D8</b>  | SD01553 | Doerder FP       | Owl's Nest | 30/07/08       | Zufall et al. 2013. Mol.Ecol |
| <b>D10</b> | SD01557 | Doerder FP       | Alstead    | 22/07/09       | Zufall et al. 2013. Mol.Ecol |
| <b>D11</b> | SD01558 | Doerder FP       | Washington | 24/07/09       | Zufall et al. 2013. Mol.Ecol |
| <b>D12</b> | SD01556 | Doerder FP       | Guys Mills | 26/08/08       | Zufall et al. 2013. Mol.Ecol |
| <b>D13</b> | SD01555 | Doerder FP       | Guys Mills | 26/08/08       | Zufall et al. 2013. Mol.Ecol |
| <b>D17</b> | SD01561 | Doerder FP       | Antrim     | 24/07/09       | Zufall et al. 2013. Mol.Ecol |

103

104

105

106

107 **Table S2:** Estimates of habitat choice for each genotype at emigration and immigration. *t*-  
 108 statistics compared to 0 are shown, with n=10 replicates for each genotype.

| strains | Habitat choice at emigration |              |              |                  | Habitat choice at immigration |               |                |                  |
|---------|------------------------------|--------------|--------------|------------------|-------------------------------|---------------|----------------|------------------|
|         | $h_e$                        | sd           | <i>t</i>     | p                | $h_i$                         | sd            | <i>t</i>       | p                |
| D1      | <b>0.494</b>                 | <b>0.531</b> | <b>2.94</b>  | <b>0.016</b>     | 0.110                         | 0.945         | 0.519          | 0.617            |
| D2      | <b>-0.459</b>                | <b>0.211</b> | <b>-6.87</b> | <b>&lt;0.001</b> | <b>-0.933</b>                 | <b>0.154</b>  | <b>-27.086</b> | <b>0.000</b>     |
| D3      | <b>-0.278</b>                | <b>0.274</b> | <b>-3.20</b> | <b>0.011</b>     | <b>-0.312</b>                 | <b>0.596</b>  | <b>-2.338</b>  | <b>0.044</b>     |
| D4      | <b>0.366</b>                 | <b>0.153</b> | <b>7.58</b>  | <b>&lt;0.001</b> | 0.111                         | 0.793         | 0.629          | 0.545            |
| D6      | <b>-0.334</b>                | <b>0.171</b> | <b>-6.18</b> | <b>&lt;0.001</b> | <b>-0.574</b>                 | <b>0.401</b>  | <b>-6.398</b>  | <b>&lt;0.001</b> |
| D7      | 0.143                        | 0.431        | 1.05         | 0.323            | <b>0.953</b>                  | <b>0.1450</b> | <b>29.382</b>  | <b>&lt;0.001</b> |
| D8      | <b>-0.325</b>                | <b>0.188</b> | <b>-5.46</b> | <b>&lt;0.001</b> | <b>0.749</b>                  | <b>0.496</b>  | <b>6.757</b>   | <b>&lt;0.001</b> |
| D10     | <b>-0.246</b>                | <b>0.282</b> | <b>-2.75</b> | <b>0.022</b>     | <b>-0.809</b>                 | <b>0.349</b>  | <b>-10.364</b> | <b>&lt;0.001</b> |
| D11     | <b>0.435</b>                 | <b>0.105</b> | <b>13.15</b> | <b>&lt;0.001</b> | <b>0.690</b>                  | <b>0.313</b>  | <b>9.864</b>   | <b>&lt;0.001</b> |
| D12     | <b>-0.368</b>                | <b>0.331</b> | <b>-3.51</b> | <b>0.007</b>     | <b>-0.519</b>                 | <b>0.736</b>  | <b>-3.153</b>  | <b>0.012</b>     |
| D13     | <b>0.599</b>                 | <b>0.119</b> | <b>15.86</b> | <b>&lt;0.001</b> | -0.008                        | 0.827         | -0.041         | 0.968            |
| D17     | <b>0.579</b>                 | <b>0.108</b> | <b>17.03</b> | <b>&lt;0.001</b> | 0.053                         | 0.615         | 0.383          | 0.711            |

109

110

111 **Table S3:** Variance partitioning analysis showing the contribution of niche width to the  
 112 variance in habitat choice at emigration and immigration. The unique contributions, that is the  
 113 percentage of variance explained, of niche width are higher than unique contributions of  
 114 thermal optimum in both cases. Interestingly, thermal optimum also explains variability in  
 115 habitat choice at immigration.

| <u><i>Habitat choice <math>h_e</math></i></u><br><u><i>at emigration</i></u>  | <u>Unique</u> | <u>Common</u> | <u>Total</u> |
|-------------------------------------------------------------------------------|---------------|---------------|--------------|
| Niche width                                                                   | 0.411         | 0.034         | 0.445        |
| Thermal optimum                                                               | 0.045         | 0.034         | 0.079        |
| <br>                                                                          |               |               |              |
| <u><i>Habitat choice <math>h_i</math></i></u><br><u><i>at immigration</i></u> | <u>Unique</u> | <u>Common</u> | <u>Total</u> |
| Niche width                                                                   | 0.115         | 0.333         | 0.448        |
| Thermal optimum                                                               | 0.061         | 0.333         | 0.394        |

116

117

118 **Figure S1:** Thermal niches of *T. thermophila* genotypes, sorted from the most specialist (top-  
119 left) to the most generalist (down-right). Points represent growth rate of each replicate along  
120 the thermal gradient (four replicates per temperature for each genotype). The black line  
121 corresponds to the fit of a general additive model of growth rate as a function of temperature.  
122 The grey area represents *niche width* (the temperature range containing 80% of the thermal  
123 niche), and the dashed line shows *thermal optimum*.

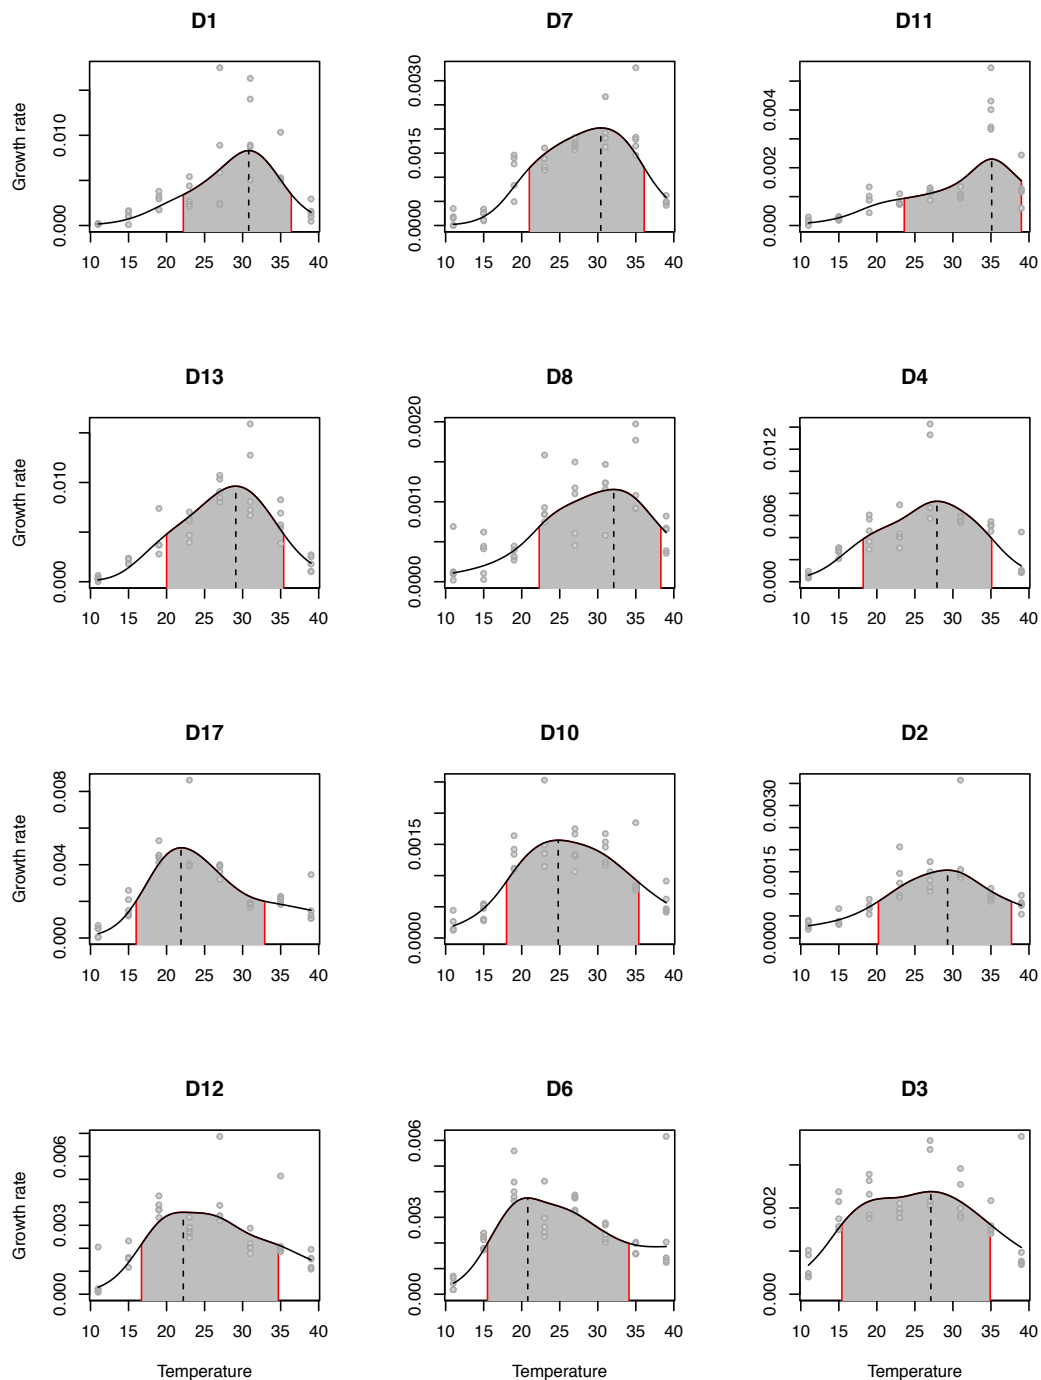

124



125 **Figure S2:** Illustration of the spatiotemporal variability of environmental conditions in the  
 126 model. The temperature variability profiles consist in periods of the central temperature  $T_2$   
 127 (white) intertwined with periods of a marginal temperature  $T_1$  (blue) or  $T_3$  (red). Each  
 128 temperature variability profile is characterized by two parameters: the proportion of time  
 129 during which the temperature is marginal  $p_m$  (x-axis in the central panel) and the duration of  
 130 each period of marginal conditions  $t_m$  (y-axis in the central panel). Profiles A to D illustrate  
 131 four scenarios of spatiotemporal variability in the 3-patch metapopulations, with the  
 132 respective combinations of  $p_m$  and  $t_m$  indicated in the central panel.

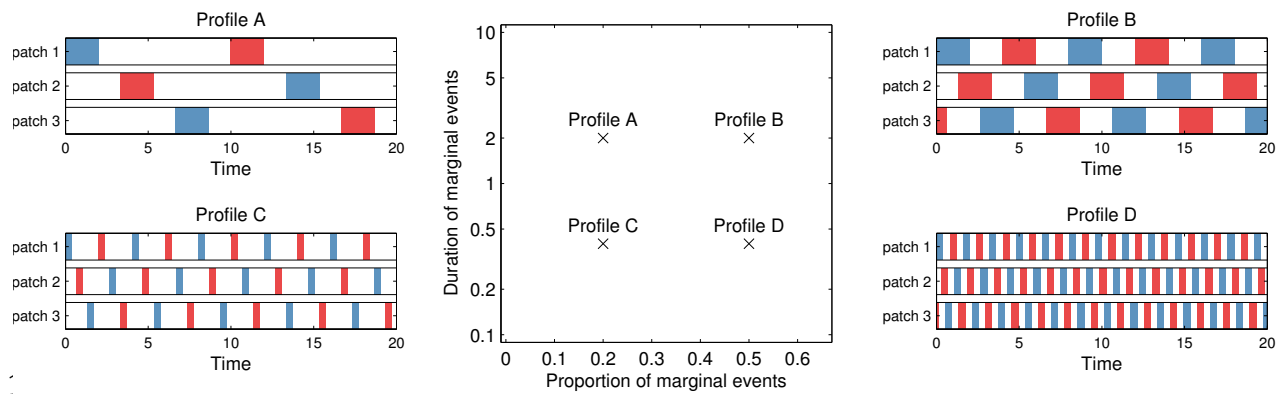

134

135 **Figure S3:** Illustration of thermal niches used in the simulations, defined based on thermal  
 136 optimum and degree of specialization to define three fitness values  $f_i(T_1)$ ,  $f_i(T_2)$  and  $f_i(T_3)$  for  
 137 each strategy  $i$ , and satisfying the specialist-generalist trade-off. The figure shows 16 thermal  
 138 niches, differing in their thermal optimum (different rows) and their degree of specialization  $s_i$   
 139 (different columns). Note that in the simulations we used a larger set of 61 thermal niches,  
 140 each combined with an habitat choice value between -1 and 1, resulting in a total of  $61 \times 11 =$   
 141 671 competing strategies.

142

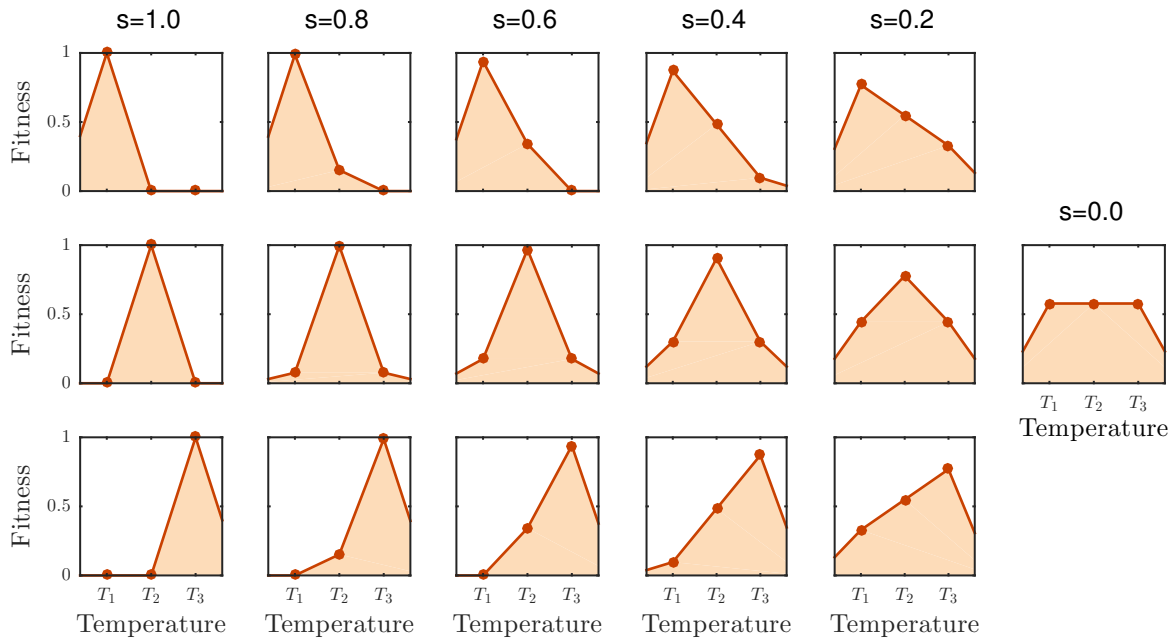

143

144

145 **Figure S4:** Abundance and degree of specialization of the two strategies coexisting in the  
 146 region labelled  $S_{central}^+ + G^-$  in Fig. 4 (with positive and negative habitat choice,  
 147 respectively). Left: specialist with positive habitat choice. Right: generalist with negative  
 148 habitat choice. Top panels: abundance, averaged over time and expressed as fraction of  
 149 carrying capacity. The generalist strategy with negative habitat choice represents about 20%  
 150 of the total metapopulation abundance. Bottom panels: specialization, a number between 0  
 151 (perfect generalist) and 1 (perfect specialist). The strategy with negative habitat choice,  
 152 meaning that it moves preferentially to the niche margins, show specialization index close to  
 153 one when the proportion of marginal events is small (but still remains more generalist than the  
 154 strategy with positive habitat choice).

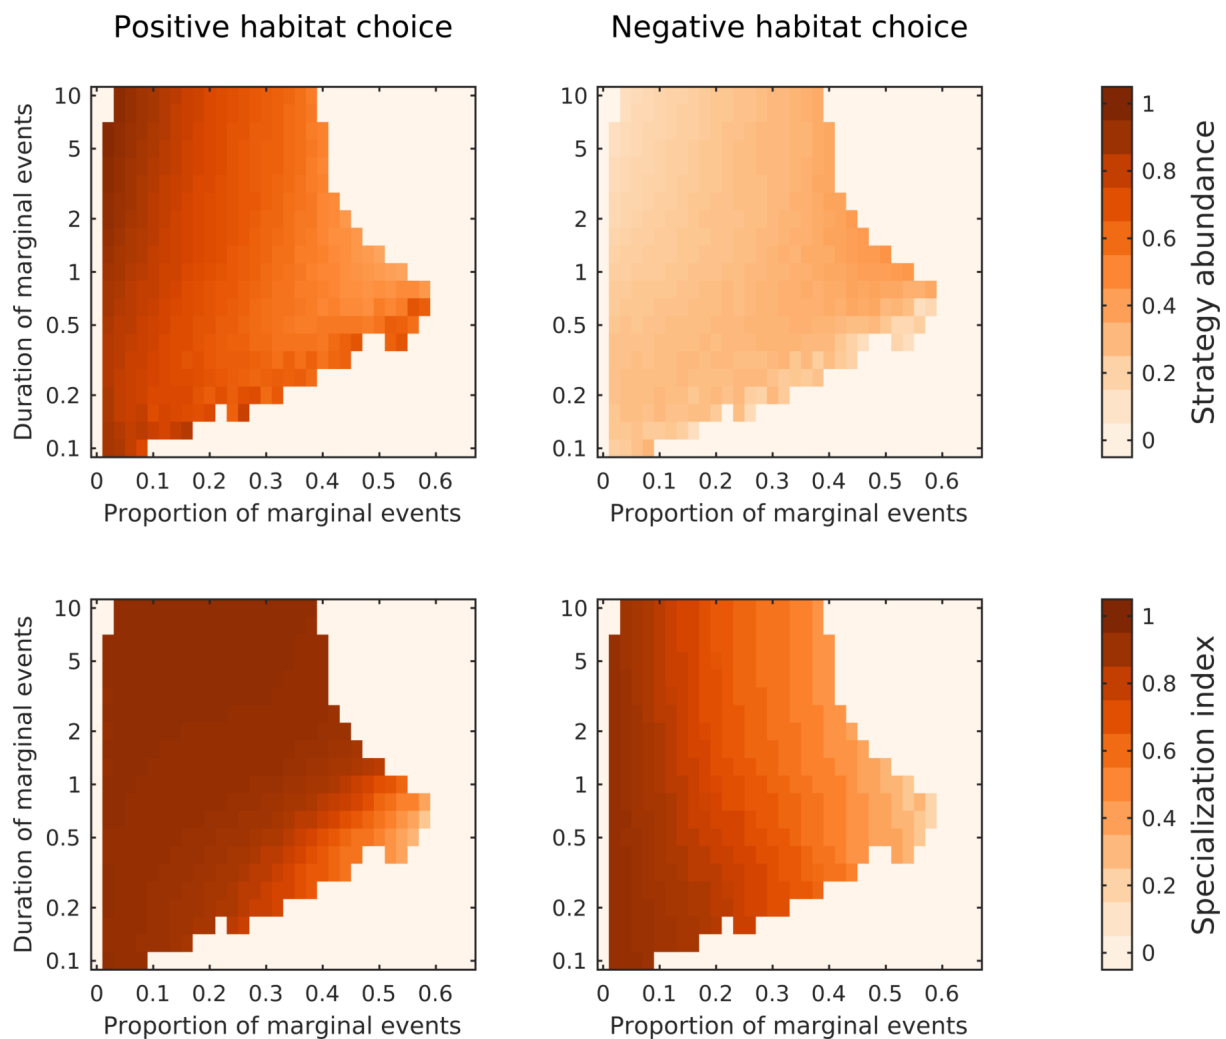

155

156

157 **Figure S5** : The coexistence of generalists with a preference for suboptimal habitats and  
 158 specialists with a preference for optimal habitats is robust with respect to model assumptions.  
 159 The figure is similar to Figure 4, but here we extend the model with the following features:  
 160 (1) a dispersal cost: we assume that 5% of the emigrants die before settling in their  
 161 destination patch; (2) a habitat choice cost: we assume that a strategy with habitat choice  
 162 parameter  $h$  has a fitness reduction of  $0.01 |h|$  compared to a strategy without habitat choice  
 163 ( $h=0$ ); (3) smaller competition between than within strategies: we assume that the strength of  
 164 competition between individuals with different strategies equals 90% of the strength of  
 165 competition between individuals with the same strategy. Due to these model modifications,  
 166 the region in which a generalist with negative habitat choice ( $h<0$ ) persists shrinks, but still  
 167 covers an important part of the parameter space (dark grey region, compare with Fig. 4).

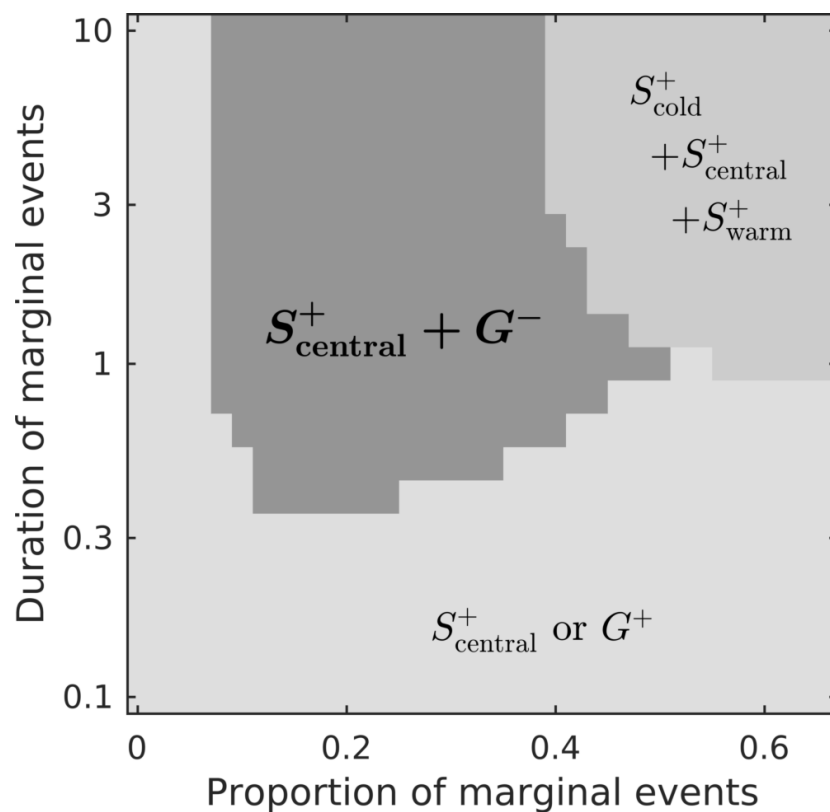

168
